# Supplementary material
Source: PubMed Central journal article supplement (PMC3522291)
Supplement: supp_M112.388470_jbc.M112.388470-1.pdf [file supp_M112.388470_jbc.M112.388470-1.pdf]

## SUPPLEMENTAL MATERIAL

**TABLE S1**

*E. coli* strains and plasmids used in this study

| Strains or plasmids           | Relevant characteristics                                                                                                                                                                                             | Source     |
|-------------------------------|----------------------------------------------------------------------------------------------------------------------------------------------------------------------------------------------------------------------|------------|
| <b><i>E. coli</i> strains</b> |                                                                                                                                                                                                                      |            |
| DH5 $\alpha$                  | <i>supE44, <math>\Delta</math>lacU169 (Y80lacZDM15), hsdR17, recA1, gyrA96, thi1, relA1</i>                                                                                                                          | (1)        |
| W3110                         | F <sup>-</sup> , IN(rrnD-rrnE)1                                                                                                                                                                                      | (2)        |
| MG1655                        | F <sup>-</sup> , $\lambda$ <sup>-</sup> , rph <sup>-1</sup>                                                                                                                                                          | (2)        |
| MC4100                        | WT, $\Delta$ <i>ara</i> , $\Delta$ <i>leu</i>                                                                                                                                                                        | (3)        |
| RH166                         | MC4100, $\Delta$ <i>ara</i> , $\Delta$ <i>leu</i> , <i>lac</i> <sup>-</sup>                                                                                                                                          | (4)        |
| $\Delta$ <i>ftsH</i>          | W3110, <i>zad220::Tn10 sfhC21<math>\Delta</math>ftsH3::kan</i>                                                                                                                                                       | (5)        |
| $\Delta$ <i>lon</i>           | RH166, <i><math>\Delta</math>lon::Tn10</i>                                                                                                                                                                           | (6)        |
| $\Delta$ <i>clpP</i>          | MC4100, <i><math>\Delta</math>clpP::kan</i>                                                                                                                                                                          | (6)        |
| $\Delta$ <i>hslUV</i>         | MC4100, <i><math>\Delta</math>hslUV::kan</i>                                                                                                                                                                         | (7)        |
| <b>plasmids</b>               |                                                                                                                                                                                                                      |            |
| pGST-FtsH                     | pGEX-2T derivative encoding GST-FtsH                                                                                                                                                                                 | (8)        |
| pMAL-C                        | Amp <sup>r</sup> , P <sub>lac</sub> , <i>lacI</i> ; encodes for N-terminal His <sub>6</sub> -MBP fusions                                                                                                             | NEB        |
| pMAL-C-FtsH                   | pMAL-C derivative encoding His <sub>6</sub> -MBP-FtsH                                                                                                                                                                | (9)        |
| pBO1748                       | pMAL-C derivative encoding His <sub>6</sub> -MBP-FtsH-H417Y                                                                                                                                                          | This study |
| pBO1749                       | pMAL-C derivative encoding His <sub>6</sub> -MBP-FtsH-E479D                                                                                                                                                          | This study |
| pBCSK(+)                      | Cm <sup>r</sup> , P <sub>lac</sub> , <i>lacZ'</i>                                                                                                                                                                    | Stratagene |
| pBO966                        | pBCSK(+) derivative containing a NdeI restriction site                                                                                                                                                               | This study |
| pASK-IBA5(+)                  | Amp <sup>r</sup> ; P/O <sub>tet</sub> , <i>tetR</i> ; encodes for N-terminal Strep tag fusions                                                                                                                       | IBA GmbH   |
| pBO1199                       | pASK-IBA5(+) derivative, the coding region for the Strep tag was replaced by <i>his<sub>6</sub>-cspD</i>                                                                                                             | (10)       |
| pBO2554                       | pBO1199 derivative encoding His <sub>6</sub> -Rsd                                                                                                                                                                    | This study |
| pBO2553                       | pBO1199 derivative encoding His <sub>6</sub> -PspA                                                                                                                                                                   | This study |
| pBO2560                       | pBO1199 derivative encoding His <sub>6</sub> -HisG                                                                                                                                                                   | This study |
| pBO2876                       | pBO1199 derivative encoding His <sub>6</sub> -YeiE                                                                                                                                                                   | This study |
| pBO2874                       | pBO1199 derivative encoding His <sub>6</sub> -Add                                                                                                                                                                    | This study |
| pBO2875                       | pBO1199 derivative encoding His <sub>6</sub> -AroG                                                                                                                                                                   | This study |
| pBO2555                       | pBO1199 derivative encoding His <sub>6</sub> -DadA                                                                                                                                                                   | This study |
| pBO2873                       | pBO1199 derivative encoding His <sub>6</sub> -IscS                                                                                                                                                                   | This study |
| pBO2872                       | pBO1199 derivative encoding His <sub>6</sub> -FdoH                                                                                                                                                                   | This study |
| pBO2561                       | pBO1199 derivative encoding His <sub>6</sub> -YfgM                                                                                                                                                                   | This study |
| pBO1750                       | pASK-IBA5(+) derivative, the coding region for the Strep tag was replaced by <i>his<sub>6</sub>-pyrH</i> ; defect repression of AHT induction system mediates constitutive gene expression after AHT promoter region | This study |
| pBO1754                       | pBO1750 derivative; <i>pyrH</i> gene was removed                                                                                                                                                                     | This study |
| pBO2596                       | pBO1750 derivative mediating constitutive expression of His <sub>6</sub> -YfgM                                                                                                                                       | This study |

**TABLE S2**

Oligonucleotides used in this study

| Name     | Amplified gene    | Template | Sequence (5'-3')                                 |
|----------|-------------------|----------|--------------------------------------------------|
| H417Y.fw | <i>ftsH-H417Y</i> | pMAL-C-  | GAGTCGACGGCTTACTACGAAGC                          |
| H417Y.rv |                   | FtsH     | CGTAGTAAGCCGTCGACTCTTT                           |
| E479D.fw | <i>ftsH-E479D</i> | pMAL-C-  | GTGGTCGACTGGCAGACGAGAT                           |
| E479D.rv |                   | FtsH     | TAGATGATCTCGTCTGCCAGTCGACC                       |
| PspA.fw  | <i>pspA</i>       | gDNA     | AAAAT <u>GTACAGGT</u> ATTTTTCTCGCTTGC            |
| PspA.rv  |                   |          | AAAAA <u>AGCTTTT</u> ATTGATTGTCTTGCTTCATT        |
| HisG.fw  | <i>hisG</i>       | gDNA     | AAAAT <u>GTACA</u> ACAGACAACACTCGTTTACG          |
| HisG.rv  |                   |          | AAAAA <u>AGCTTTT</u> CACTCCATCATCTTCTCA          |
| DadA.fw  | <i>dadA</i>       | gDNA     | AAAAT <u>GTACAC</u> GAGTTGTCATACTGGGAAG          |
| DadA.rv  |                   |          | AAAAA <u>AGCTTTT</u> AGCTGTGTGCGCC               |
| YfgM.fw  | <i>yfgM</i>       | gDNA     | AAAAT <u>GTACAG</u> AAATTTACGAGAACGAAAACG        |
| YfgM.rv  |                   |          | AAAAA <u>AGCTTTT</u> CAGATGGACAAATTATTAATTTTC    |
| Rsd.fw   | <i>Rsd</i>        | gDNA     | AAAAT <u>GTACA</u> CTTAACCAGCTCGATAACCTG         |
| Rsd.rv   |                   |          | AAAAA <u>AGCTTTT</u> CAAGCAGGATGTTTGAC           |
| IscS3.fw | <i>iscS</i>       | gDNA     | AAA <u>AGTACCA</u> AAATTACCGATTTATCTCGAC         |
| IscS.rv  |                   |          | AAAAA <u>AGCTTTT</u> AATGATGAGCCCATTC            |
| AroG.fw  | <i>aroG</i>       | gDNA     | AAAAT <u>GTACA</u> AAATTATCAGAACGACGATTTACGCATCA |
| AroG.rv  |                   |          | AAAAA <u>AGCTTTT</u> ACCCGCGACGCGCTT             |
| Add.fw   | <i>add</i>        | gDNA     | AAAAT <u>GTACA</u> ATTGATACCACCCTGCCA            |
| Add3.rv  |                   |          | AAAAGCCGGCTTACTTCGCGGC                           |
| YeiE.fw  | <i>yeiE</i>       | gDNA     | AAAAT <u>GTACAC</u> ACATCACCTCCGGCAG             |
| YeiE.rv  |                   |          | AAAAGCCGGCTTAAACGCGGCAC                          |
| FdoH.fw  | <i>fdoH</i>       | gDNA     | AAAAT <u>GTACAG</u> CTTATCAATCTCAAGATATCATTG     |
| FdoH.rv  |                   |          | AAAAA <u>AGCTTTT</u> CATTTGCGCTCCTCG             |

For each construct, the forward and reverse oligonucleotides are given in succession. Restriction sites used for cloning or selection are underlined.

## REFERENCES

1. Sambrook, J., and Russell, D.W. (2001) *Molecular cloning: a laboratory manual*, 3rd ed., Cold Spring Harbor Laboratory Press, Cold Spring Harbor, N.Y.
2. Bachmann, B.J. (1972) Pedigrees of some mutant strains of *Escherichia coli* K-12. *Bacteriol Rev.* **36**, 525-557.
3. Casadaban, M.J. (1976) Transposition and fusion of the *lac* genes to selected promoters in *Escherichia coli* using bacteriophage lambda and Mu. *J. Mol. Biol.* **104**, 541-555.
4. Becker, G., and Hengge-Aronis, R. (2001) What makes an *Escherichia coli* promoter  $\sigma^S$  dependent? Role of the -13/-14 nucleotide promoter positions and region 2.5 of  $\sigma^S$ . *Mol. Microbiol.* **39**, 1153-1165.
5. Tatsuta, T., Tomoyasu, T., Bukau, B., Kitagawa, M., Mori, H., Karata, K., and Ogura, T. (1998) Heat shock regulation in the *ftsH* null mutant of *Escherichia coli*: dissection of stability and activity control mechanisms of  $\sigma^{32}$  in vivo. *Mol. Microbiol.* **30**, 583-593.
6. Barembruch, C., and Hengge, R. (2007) Cellular levels and activity of the flagellar  $\sigma$  factor FliA of *Escherichia coli* are controlled by FlgM-modulated proteolysis. *Mol. Microbiol.* **65**, 76-89.
7. Schmidt, R., Zahn, R., Bukau, B., and Mogk, A. (2009) ClpS is the recognition component for *Escherichia coli* substrates of the N-end rule degradation pathway. *Mol. Microbiol.* **72**, 506-517.
8. Shotland, Y., Shifrin, A., Ziv, T., Teff, D., Koby, S., Kobilier, O., and Oppenheim, A.B. (2000) Proteolysis of bacteriophage lambda CII by *Escherichia coli* FtsH (HflB). *J. Bacteriol.* **182**, 3111-3116.
9. Katz, C., and Ron, E.Z. (2008) Dual role of FtsH in regulating lipopolysaccharide biosynthesis in *Escherichia coli*. *J. Bacteriol.* **190**, 7117-7122.
10. Langklotz, S., and Narberhaus, F. (2011) The *Escherichia coli* replication inhibitor CspD is subject to growth-regulated degradation by the Lon protease. *Mol. Microbiol.* **80**, 1313-1325.
